# Supplementary material for: Heterogeneous Fenton-like catalysis of Fe-MOF derived magnetic carbon nanocomposites for degradation of 4-nitrophenol
Source: Royal Society of Chemistry journal article supplement (doi:10.1039/c7ra09234b), 2017-01-01
Supplement: c7ra09234b1.pdf [file c7ra09234b1.pdf]

## Supporting information

### Heterogeneous Fenton-like Catalysis of Fe-MOF derived Magnetic Carbon Nanocomposites for Degradation of 4-Nitrophenol

Dezhi Chen<sup>a</sup>, Shasha Chen<sup>a</sup>, Shasha Xie<sup>a</sup>, Yijie Jiang<sup>a</sup>, Hongying Quan<sup>b</sup>, Li Hua<sup>a</sup>,

Xubiao Luo<sup>a\*</sup> and Lin Guo<sup>a,c</sup>

<sup>a</sup> Key Laboratory of Jiangxi Province for Persistent Pollutants Control and Resources Recycle, School of Environmental and Chemical Engineering, Nanchang Hangkong University, No. 696, Fenghe South Avenue, Nanchang, 330063, China.

<sup>b</sup> School of Materials Science and Engineering, Nanchang Hangkong University, No. 696, Fenghe South Avenue, Nanchang 330063, China.

**Table S1** Summary of BET surface areas, total pore volume and pore size calculated from nitrogen isotherms for the obtained MIL-88-Fe-x. (x=400, 450, 500, 550, 600)

| Samples             | BET Surface Area(m <sup>2</sup> /g) | Total pore volume(cm <sup>3</sup> /g) | Average Pore Size(nm) |
|---------------------|-------------------------------------|---------------------------------------|-----------------------|
| Fe-C <sub>400</sub> | 49.1094                             | 0.104012                              | 8.47187               |
| Fe-C <sub>450</sub> | 42.9603                             | 0.126614                              | 11.78889              |
| Fe-C <sub>500</sub> | 86.6838                             | 0.182011                              | 8.39883               |
| Fe-C <sub>550</sub> | 171.2443                            | 0.419783                              | 9.80548               |
| Fe-C <sub>600</sub> | 88.9648                             | 0.252081                              | 11.33396              |

**Table S2.** The elements in the surface of Fe-C<sub>x</sub> composites by XPS results.

| Atom%               | Iron | Oxygen | Carbon | chlorine | Nitrogen |
|---------------------|------|--------|--------|----------|----------|
| Fe-MOF              | 5.47 | 27.82  | 60.47  | 4.84     | 1.40     |
| Fe-C <sub>400</sub> | 4.78 | 17.88  | 72.07  | 4.12     | 1.15     |
| Fe-C <sub>450</sub> | 3.03 | 13.23  | 79.56  | 3.06     | 1.12     |
| Fe-C <sub>500</sub> | 2.83 | 9.87   | 84.10  | 2.73     | 0.47     |
| Fe-C <sub>550</sub> | 1.11 | 4.93   | 92.42  | 1.04     | 0.51     |
| Fe-C <sub>600</sub> | 1.33 | 5.07   | 93.11  | 0.34     | 0.15     |

**Table S3.** Speculated main components of Fe-C<sub>x</sub> at different pyrolysis temperature

| Speculated main components |                                                                                                                                                                                                    |
|----------------------------|----------------------------------------------------------------------------------------------------------------------------------------------------------------------------------------------------|
| Fe-MOF                     | Fe <sub>3</sub> (O)Cl[C <sub>6</sub> H <sub>4</sub> (CO <sub>2</sub> ) <sub>2</sub> ] <sub>3</sub> (C <sub>3</sub> H <sub>7</sub> NO)                                                              |
| Fe-C <sub>400</sub>        | Fe <sub>3</sub> (O)Cl <sub>i</sub> [C <sub>6</sub> H <sub>4</sub> (CO <sub>2</sub> ) <sub>2-n</sub> ] <sub>3-j</sub> (C <sub>3-m</sub> N)                                                          |
| Fe-C <sub>450</sub>        | Fe <sub>3-m</sub> (O)Cl <sub>i</sub> [C <sub>6</sub> H <sub>4</sub> (CO <sub>2</sub> ) <sub>2-n</sub> ] <sub>3-j</sub> (C <sub>3-m</sub> N), γ-Fe <sub>2</sub> O <sub>3</sub> and amorphous carbon |
| Fe-C <sub>500</sub>        | Fe <sub>3-m</sub> (O)Cl <sub>i</sub> [C <sub>6</sub> H <sub>4</sub> (CO <sub>2</sub> ) <sub>2-n</sub> ] <sub>3-j</sub> (C <sub>3-m</sub> N), γ-Fe <sub>2</sub> O <sub>3</sub> and amorphous carbon |
| Fe-C <sub>550</sub>        | γ-Fe <sub>2</sub> O <sub>3</sub> , Fe <sub>3</sub> O <sub>4</sub> and amorphous carbon                                                                                                             |
| Fe-C <sub>600</sub>        | Fe <sub>3</sub> O <sub>4</sub> and amorphous carbon                                                                                                                                                |

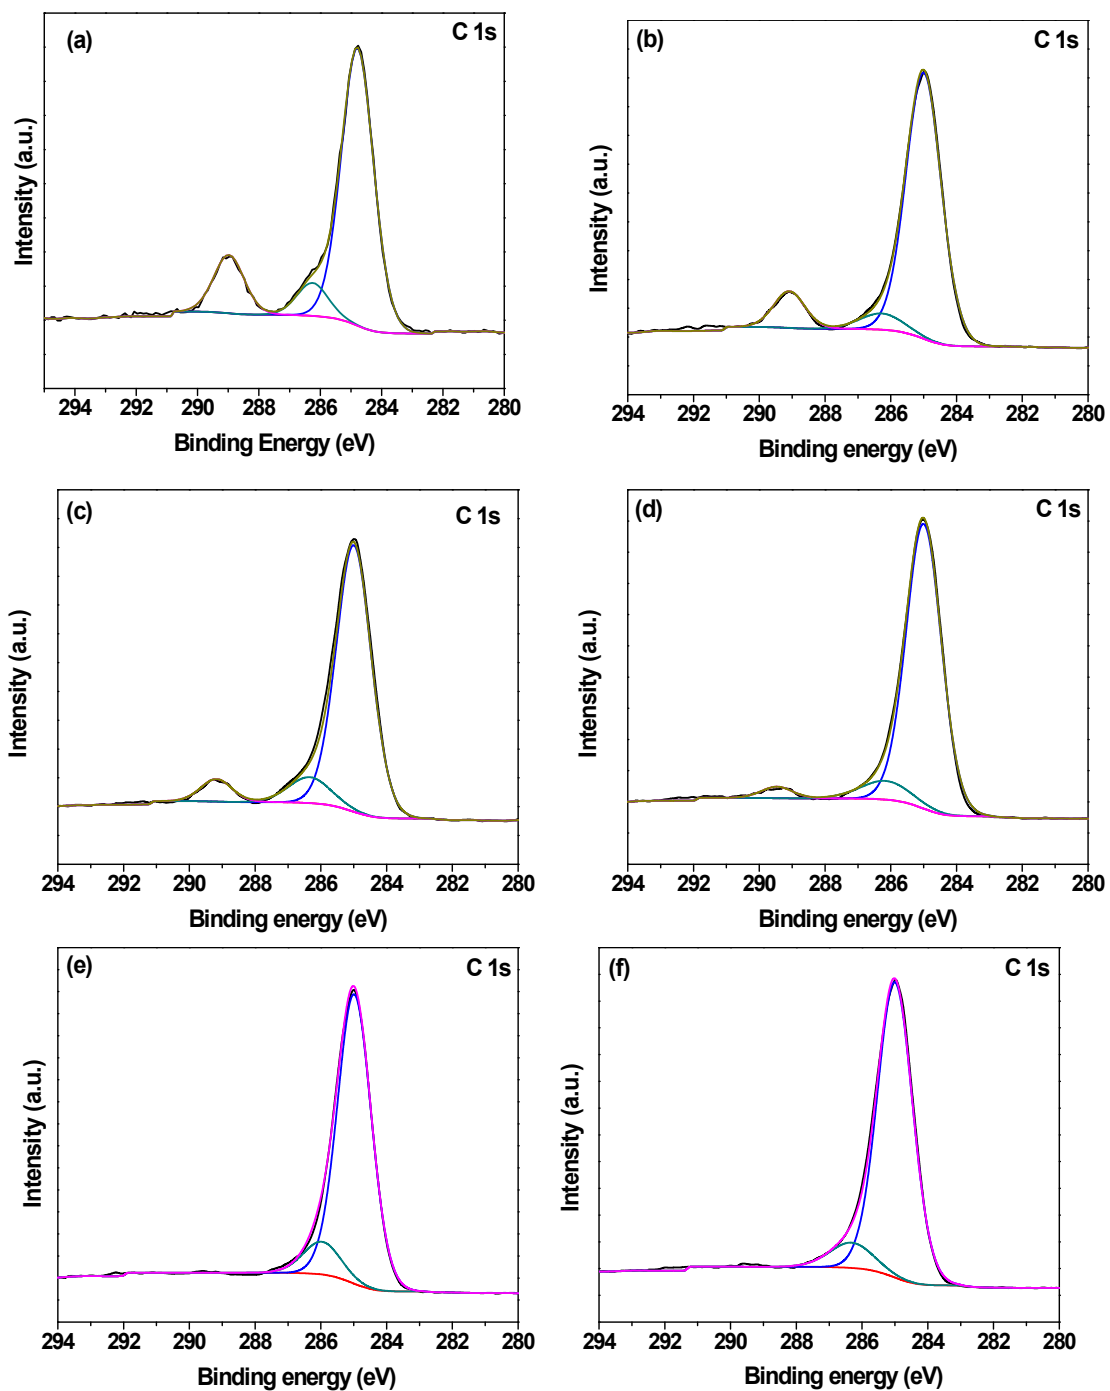

Figure S1. C 1s spectra of a) Fe-MOF, b) Fe-C<sub>400</sub>, c) Fe-C<sub>450</sub>, d) Fe-C<sub>500</sub>, e) Fe-C<sub>550</sub>, d) Fe-C<sub>600</sub>.

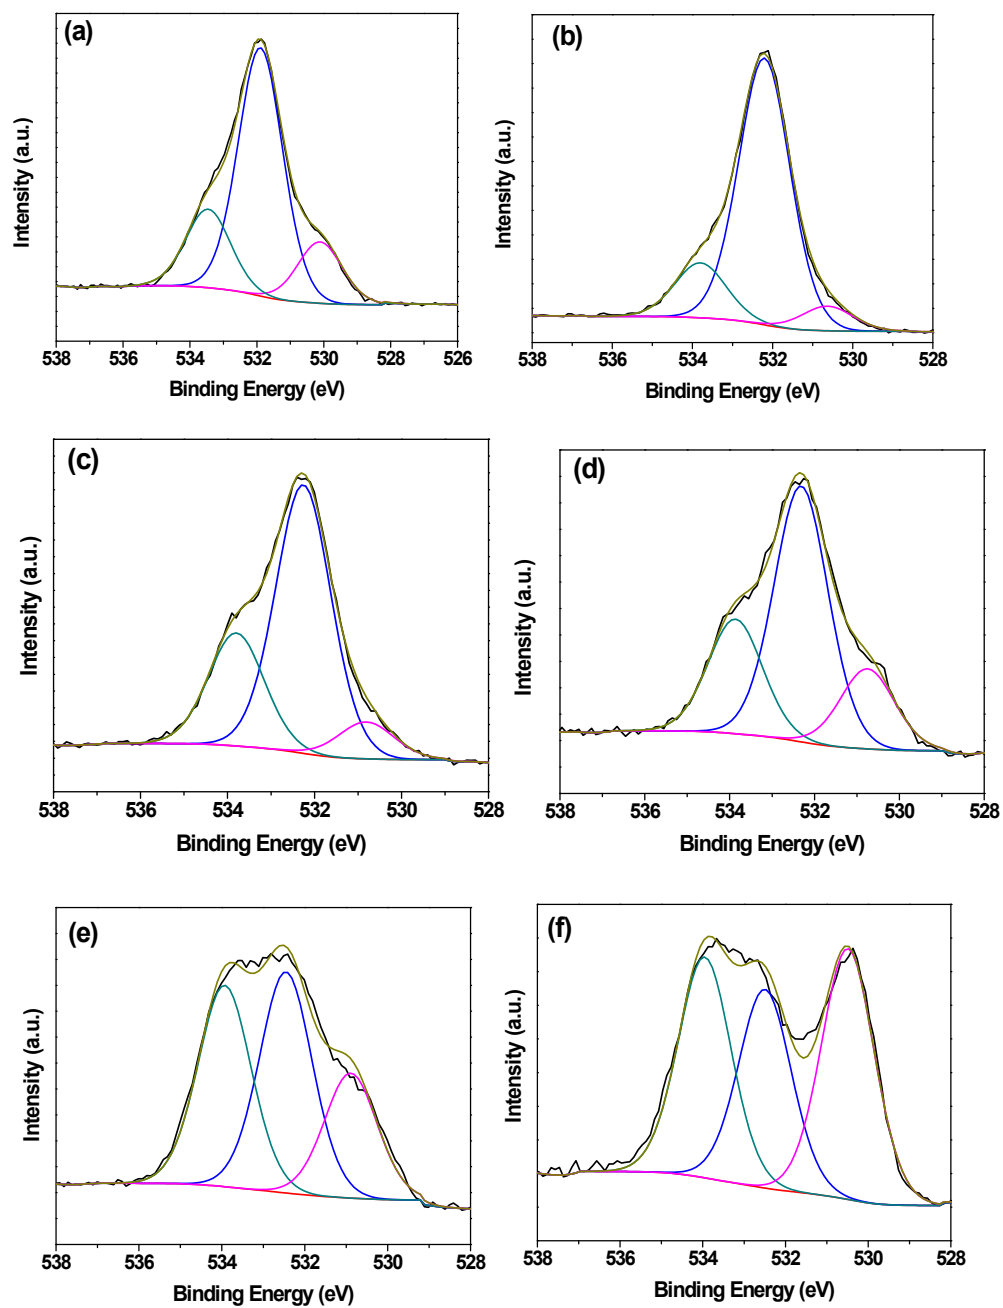

Figure S2. O 1s spectra of a) Fe-MOF, b) Fe-C<sub>400</sub>, c) Fe-C<sub>450</sub>, d) Fe-C<sub>500</sub>, e) Fe-C<sub>550</sub>, f) Fe-C<sub>600</sub>.

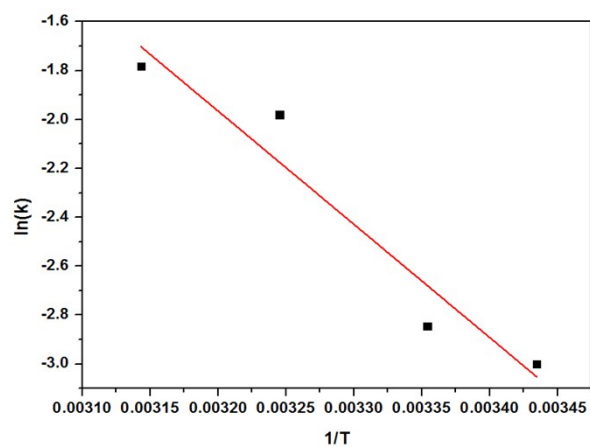

Figure S3. Arrhenius linear plot of the degradation of 4-NP by Fe-C<sub>500</sub>

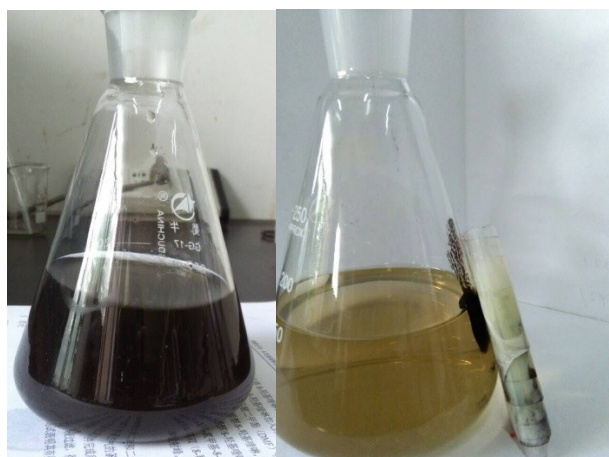

Figure S4. Recycling of Fe-C<sub>500</sub> by using a magnet after 4 cycles.
